# Supplementary material
Source: Research Square preprint supplement (doi:10.21203/rs.3.rs-9641242/v1)
Supplement: Supplementary file 1 [file 60ee2c59200abcd6f07e81c1.docx]

**Supplementary Video 1: Animation of 3D nanoprinting at the speed of light.** The calculated holographically-shaped light pulse for the trefoil knot structure in Fig. 4d is illustrated exposing a photoresist. See details on the calculation in the Methods. The polymerization time is assumed to be 1 ms.
